# Supplementary material
Source: Springer Nature journal article supplement (https://www.springermedizin.de/resource/supplementary/12885_2012_3716_MOESM7_ESM.pdf/9465920)

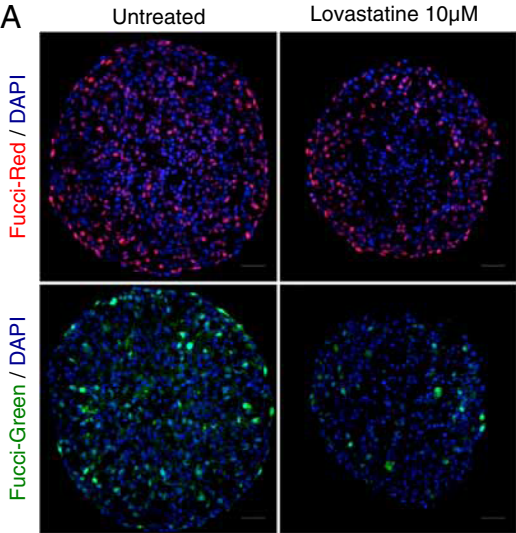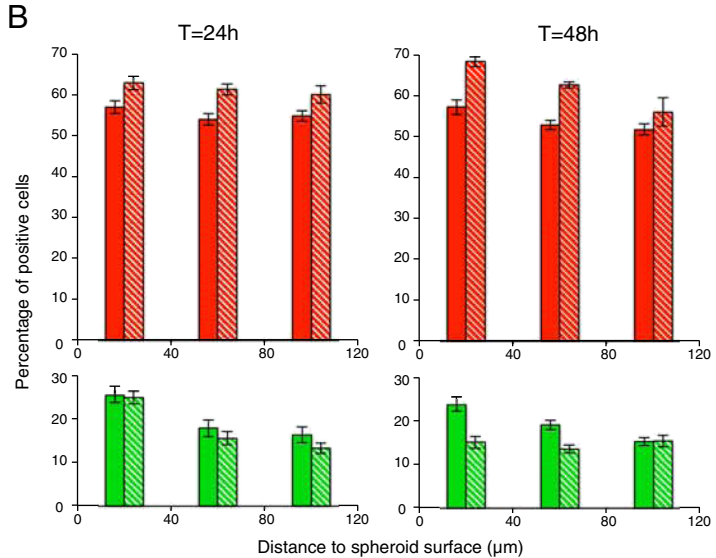

Fucci-Red: ■ Untreated ▨ 10 $\mu$ M Lovastatine  
 Fucci-Green: ■ Untreated ▨ 10 $\mu$ M Lovastatine

Supplement: MOESM7 [file 9465920]
